# Supplementary material for: A Potential Predictive Role of the Scalp Microbiome Profiling in Patients with Alopecia Areata: Staphylococcus caprae, Corynebacterium, and Cutibacterium Species
Source: MDPI journal article supplement (doi:10.3390/microorganisms10050864), 2022-04-21
Supplement: s1 [file s1]

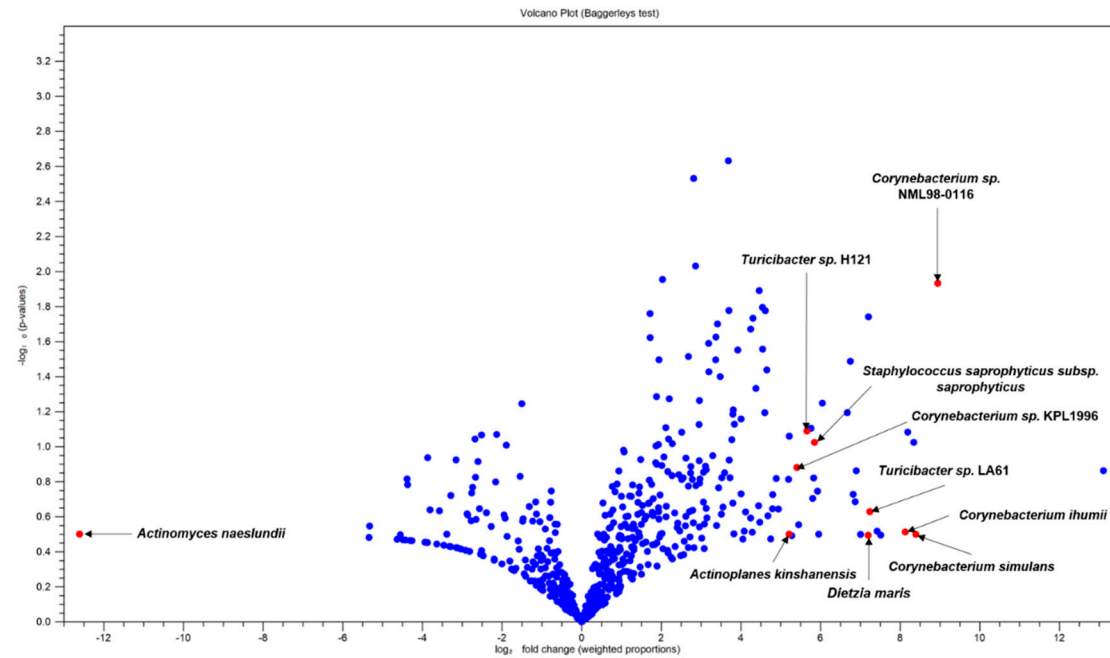

**Supplementary Figure 1.** Volcano plot showing bacterial taxa related to alopecia areata. The genus *Corynebacterium* which is represented in the microbiome by the several OTU: *Corynebacterium ihumii*, *Corynebacterium simulans*, *Corynebacterium sp. NML98-0116*, *Corynebacterium sp. KPL 1996* were distinctive to AA than HC.
